# Supplementary material for: Single-cell analysis of human MAIT cell transcriptional, functional and clonal diversity
Source: PubMed Central journal article supplement (PMC10457204; doi:10.1038/s41590-023-01575-1), 2023-08-14
Supplement: 41590_2023_1575_MOESM1_ESM.pdf [file 41590_2023_1575_MOESM1_ESM.pdf]

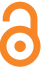

---

# Single-cell analysis of human MAIT cell transcriptional, functional and clonal diversity

---

In the format provided by the authors and unedited

---

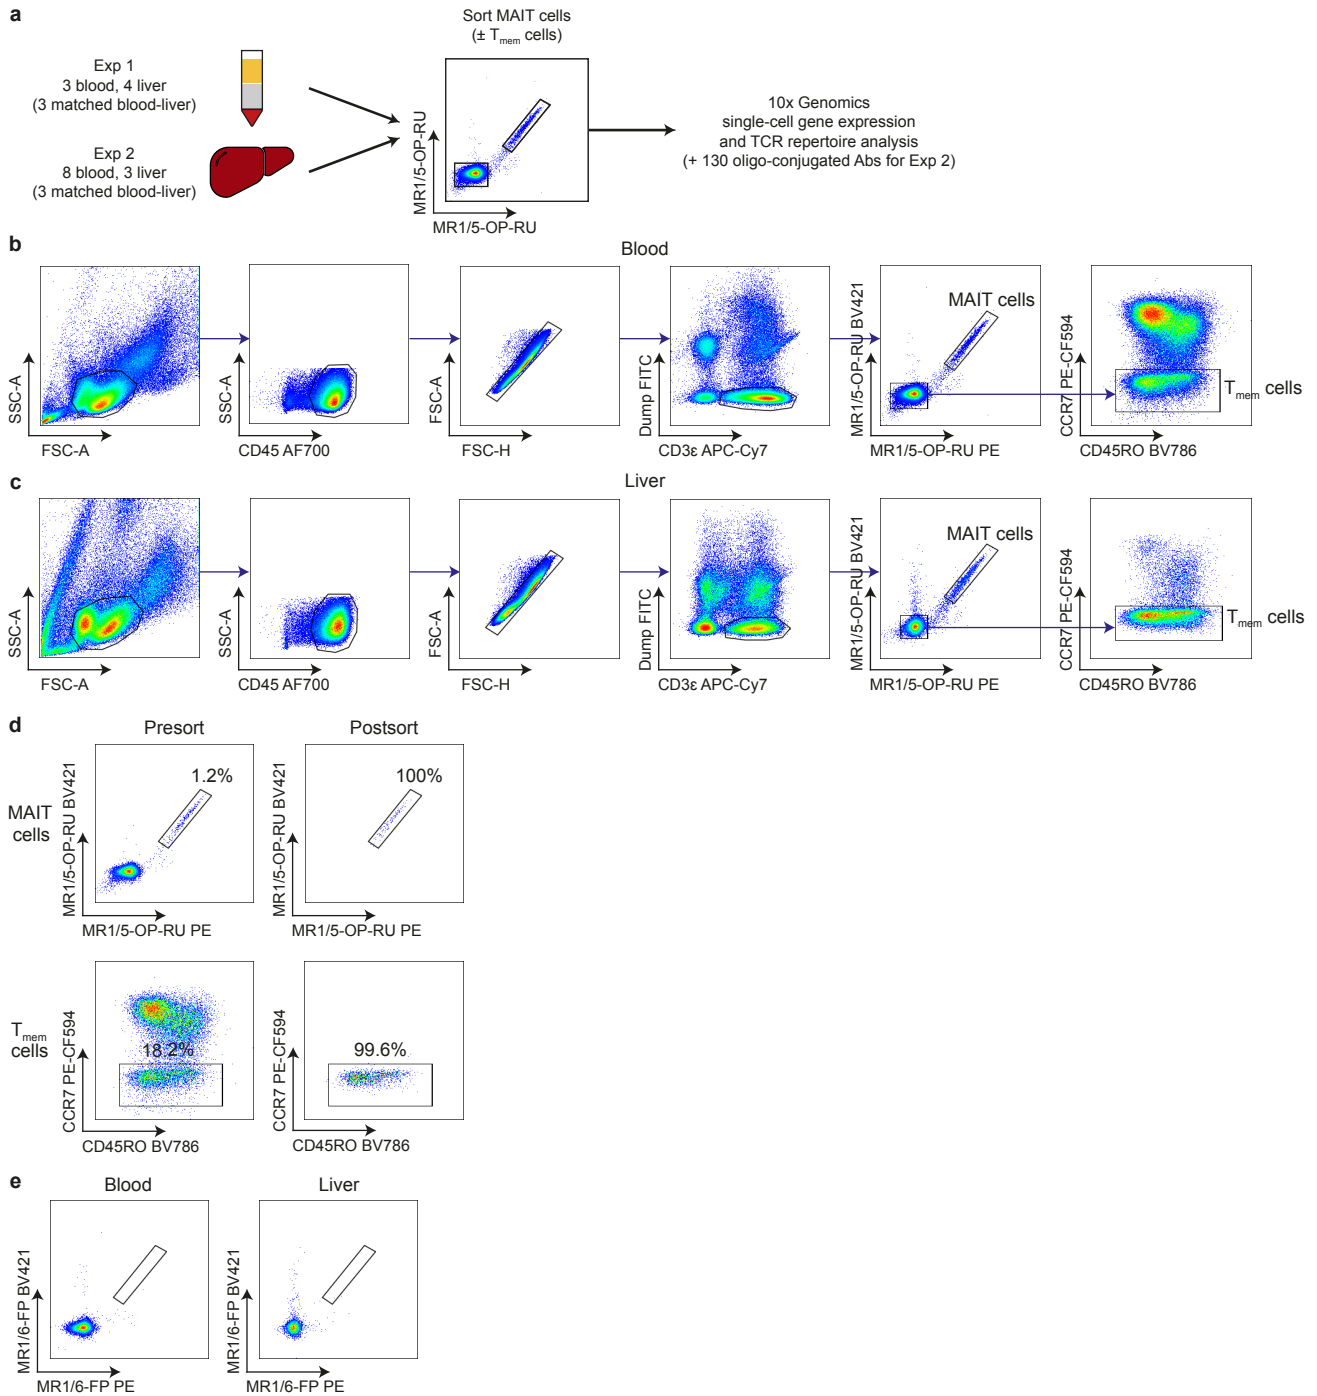

**Supplementary Fig. 1 | Blood-liver experiments schematic and gating strategy.** **a**, Schematic illustrating the experimental protocol for Exp 1 and Exp 2. **b,c**, Gating strategy for sorting MAIT cells (CD3<sup>+</sup>MR1/5-OP-RU<sup>+</sup>) and conventional memory T (T<sub>mem</sub>) cells (CD3<sup>+</sup>MR1/5-OP-RU<sup>-</sup>CCR7<sup>-</sup>) from matched human blood (**b**) and liver (**c**). Dump channel contained antibodies to CD14, CD19, TCR γδ, TCR Vα24-Jα18, and TCR Vδ2, plus SYTOX Green Nucleic Acid Stain. **d**, FACS plots for a representative sample showing MAIT and T<sub>mem</sub> cells presort and postsort. Sort purity was > 99%. **e**, FACS plots for representative blood and liver samples stained with the negative control MR1/6-FP tetramer.

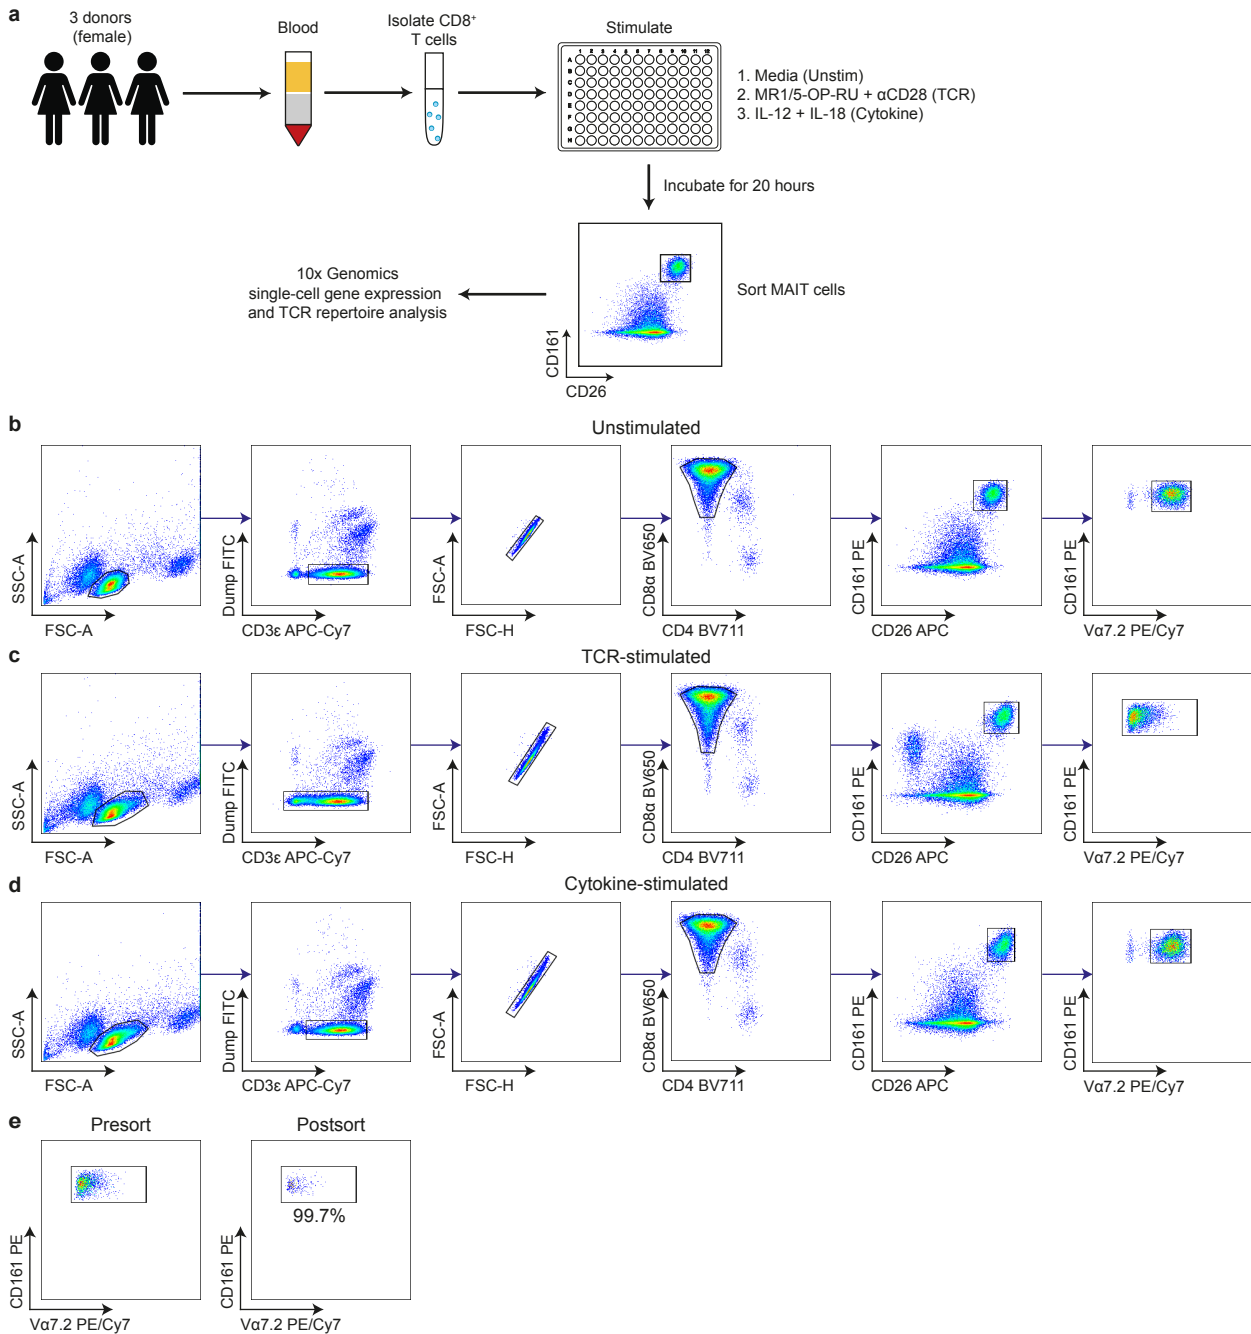

**Supplementary Fig. 2 | Exp 3 schematic and gating strategy.** **a**, Schematic illustrating the experimental protocol for Exp 3. **b-d**, Gating strategy for sorting MAIT cells (CD3<sup>+</sup>CD8<sup>+</sup>CD26<sup>+</sup>CD161<sup>hi</sup>Va7.2<sup>+</sup>) from unstimulated (**b**), TCR-stimulated (**c**), and cytokine-stimulated (**d**) isolated CD8<sup>+</sup> cells. Due to TCR downregulation within the TCR stimulation condition (**c**), MAIT cells were sorted as CD8<sup>+</sup>CD26<sup>+</sup>CD161<sup>hi</sup> lymphocytes. The CD26<sup>+</sup>CD161<sup>int</sup> lymphocytes are CD3<sup>+</sup>CD8<sup>low</sup> and are likely to be NK cells. Dump channel contained antibodies to CD14, CD19, TCR γδ, TCR Va24-Ja18, and TCR Vδ2, plus SYTOX Green Nucleic Acid Stain. **e**, FACS plots for a representative sample (TCR stimulation condition) showing MAIT cells presort and postsort. Sort purity was > 99%.

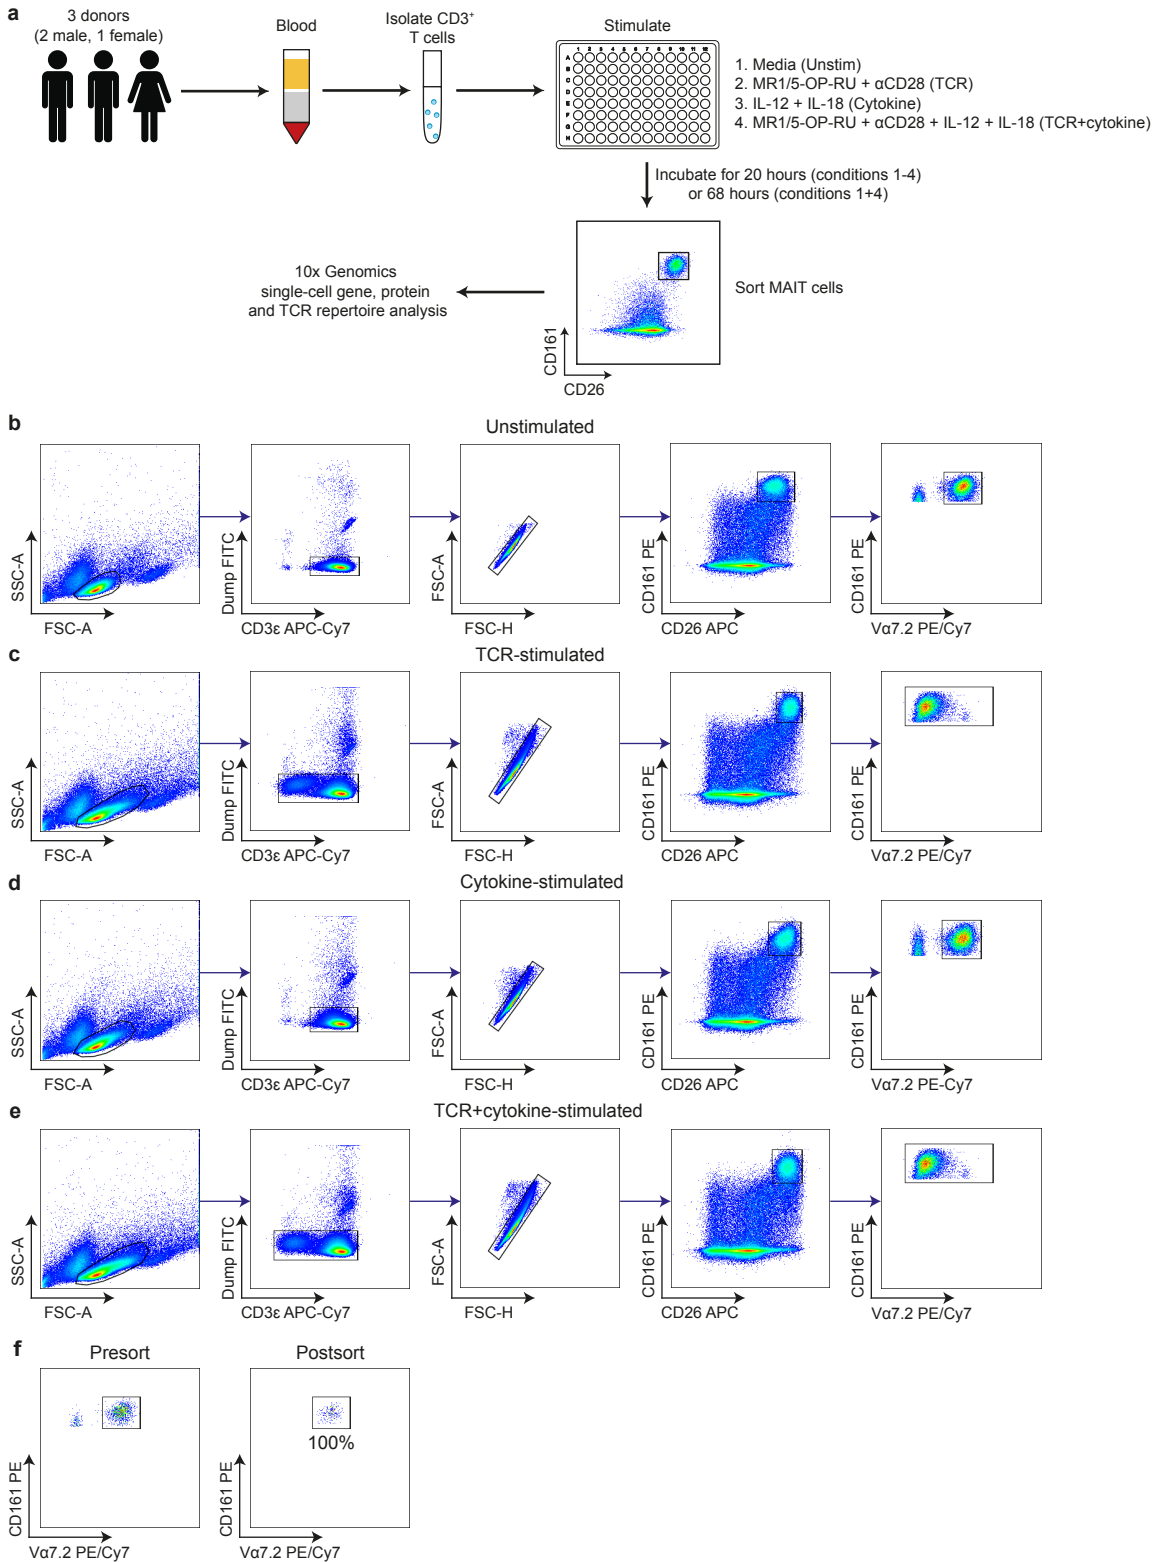

**Supplementary Fig. 3 | Exp 4 schematic and gating strategy.** **a**, Schematic illustrating the experimental protocol for Exp 4. **b-e**, Gating strategy for sorting MAIT cells (CD3<sup>+</sup>CD26<sup>+</sup>CD161<sup>hi</sup>Vα7.2<sup>+</sup>) from unstimulated (**b**), TCR-stimulated (**c**), cytokine-stimulated (**d**), and TCR+cytokine-stimulated (**e**) isolated CD3<sup>+</sup> cells. Due to TCR downregulation within the TCR and TCR+cytokine stimulation conditions (**c**, **e**), MAIT cells were sorted as CD26<sup>+</sup>CD161<sup>hi</sup> lymphocytes. Dump channel contained antibodies to CD14, CD19, TCR γδ, TCR Vα24-Jα18, and TCR Vδ2, plus SYTOX Green Nucleic Acid Stain. **f**, FACS plots for a representative sample (unstimulated condition) showing MAIT cells presort and postsort. Sort purity was > 99%.
