# Supplementary material for: Single-cell analysis of human MAIT cell transcriptional, functional and clonal diversity
Source: PubMed Central journal article supplement (PMC10457204; doi:10.1038/s41590-023-01575-1), 2023-08-14
Supplement: 41590_2023_1575_MOESM4_ESM.pdf [file 41590_2023_1575_MOESM4_ESM.pdf]

| Donor | Age | Sex | Diagnosis/liver surgery                             | Background liver                                        | Potential immunomodulatory therapy                     |
|-------|-----|-----|-----------------------------------------------------|---------------------------------------------------------|--------------------------------------------------------|
| 1.1   | 50  | F   | Resection of primary hepatocellular carcinoma       | Minimal steatosis, no fibrosis                          | Nil                                                    |
| 1.2   | 51  | F   | R hepatectomy for hemangioma                        | Normal                                                  | Nil                                                    |
| 1.3   | 65  | M   | R hepatectomy for rectosigmoid tumor metastasis     | Normal                                                  | Previous chemotherapy (8 cycles > 2 months previously) |
| 1.4   | 65  | M   | Resection of primary hepatocellular carcinoma       | Mild steatosis, moderate fibrosis                       | Nil                                                    |
| 2.1   | 37  | F   | Resection of benign liver adenoma                   | Normal                                                  | Nil                                                    |
| 2.2   | 27  | F   | Resection of benign focal nodular hyperplasia (FNH) | Mild nodular regenerative hyperplasia, otherwise normal | Nil                                                    |
| 2.3   | 42  | F   | Resection for benign polycystic liver disease       | No steatosis, mild portal fibrosis                      | Nil                                                    |

**Supplementary Table 1. Characteristics of liver tissue donors.** Two patients had primary hepatocellular carcinoma, one had an isolated metastasis from a colonic tumor (this patient had had prior chemotherapy), and the others had benign lesions.
